# Supplementary material for: Horizontal gene transfer in human-associated microorganisms inferred by phylogenetic reconstruction and reconciliation
Source: PubMed Central journal article supplement (PMC6459891; doi:10.1038/s41598-019-42227-5), 2019-04-11
Supplement: 41598_2019_42227_MOESM1_ESM.pdf [file 41598_2019_42227_MOESM1_ESM.pdf]

## Horizontal gene transfer in human-associated microorganisms inferred by phylogenetic reconstruction and reconciliation

Hyeonsoo Jeong<sup>1,2</sup>, Bushra Arif<sup>3</sup>, Gustavo Caetano-Anollés<sup>4</sup>, Kyung Mo Kim<sup>5\*</sup>, Arshan Nasir<sup>3\*</sup>

<sup>1</sup>Department of Animal Sciences, University of Illinois at Urbana-Champaign, Urbana, IL, USA.

<sup>2</sup>School of Biological Sciences, Georgia Institute of Technology, Atlanta, GA, United States

<sup>3</sup>Department of Biosciences, COMSATS University Islamabad, Park Road, Tarlai Kalan, Islamabad, Pakistan

<sup>4</sup>Department of Crop Sciences, University of Illinois at Urbana-Champaign, Urbana, IL, USA

<sup>5</sup>Division of Polar Life Sciences, Korea Polar Research Institute, Incheon, Republic of Korea

\*For correspondence: [arshan.nasir@gmail.com](mailto:arshan.nasir@gmail.com) and [kmkim@kopri.re.kr](mailto:kmkim@kopri.re.kr)

### Supplementary Materials

**Table S1. *HGTree-genomes* analyzed in this study.** HGT-index is the number of HGT-genes in a genome divided by the total number of genes in that genome. Phyla common between *HGTree-genomes* and *HMP-genomes* are highlighted.

**Table S2. *HMP-genomes* analyzed in this study.** HGT-index is the number of HGT-genes in a genome divided by the total number of genes in that genome.

**Table S3. ANI multi-residence test on strains.** Highlighted rows indicate probable multiresidence cases.

**Table S4. ANI multi-residence test on species.**

**Table S5. Number of genera matching the list of possibly contaminant genera.**

**Table S6. Pairwise Mann–Whitney *U* test to evaluate statistically significant comparisons among phylogenetically similar and diverse microorganisms occupying similar and diverse habitats.** Bonferroni adjusted *P*-values are listed, where available.

**Table S7. Number of total, *intra-niche*, and *inter-niche* detected HGT events in all body site combinations.**

**Table S8. Description of top 10% frequently transferred genes (FTGs).** Top 10% determined by HGT-index distribution, which, in the case of individual genes/proteins, is the number of detected HGT events on a gene tree divided by total number of genomes (taxa) member of that gene tree. Ortholog Id is a unique identifier assigned to each putative orthologous gene set produced by ProteinOrtho<sup>64</sup>. Matching PFs and GOs are also listed next to each FTP. BP, biological process; CC, cellular component; MF, molecular function, as defined by the GO hierarchy.

**Table S9. GO terms significantly enriched in the top 10% frequently transferred proteins, as identified by their HGT-index value.** PFs matching to GO terms are also listed.

**Table S10. Description of recently transferred genes (RTGs) that were not identified as FTPs in the *HGTtree-genomes*.** PF and GO Ids and descriptions are listed next to each RTP. HGT-index is the number of *one-to-one* HGT events divided by the total number of detected HGT events on that gene tree.

**Table S11. GO terms significantly enriched in the top 10% recently transferred genes, as identified by their HGT-index value.** PFs matching to GO terms are also listed.

**Table S12. Description of *HGT-free* genes.** *HGT-free* genes did not produce detectable tree conflict during reconciliation of gene and species trees. Only genes present in at least 10 genomes are listed.

**Table S13. HGT potential of core genes.** Core genes were present in >70% of total sampled *HMP-genomes* and detected in each of the six body sites studied. Ortholog Id is a unique identifier assigned to each putative orthologous gene set produced by ProteinOrtho. Matching COG categories are also described. HGT-index is the number of detected HGT events on that gene tree divided by the total number of taxa. Ribosomal proteins are highlighted.

**Table S14. List of 31 genes detected in more than 90% *HMP-genomes* with HGT-index < 0.2.**
